# Supplementary material for: Solvent-free microwave-assisted Bingel reaction in carbon nanohorns
Source: Royal Society of Chemistry journal article supplement (doi:10.1039/b910947a), 2009-01-01
Supplement: b910947a.pdf [file b910947a.pdf]

## Supplementary Material

### Solvent-free microwave-assisted Bingel reaction in carbon nanohorns

Solon P. Economopoulos,<sup>a</sup> Georgia Pagona,<sup>a</sup> Masako Yudasaka,<sup>b</sup> Sumio Iijima<sup>b</sup> and Nikos Tagmatarchis<sup>\*a</sup>

<sup>a</sup> Theoretical and Physical Chemistry Institute, National Hellenic Research Foundation, Vass. Constantinou 48 Avenue, 11635 Athens, Greece.

<sup>b</sup> Nanotube Research Center, National Institute of Advanced Industrial Science and Technology (AIST), Central  
5, 1-1-1 Higashi, Tsukuba, Ibaraki 305-8565, Japan

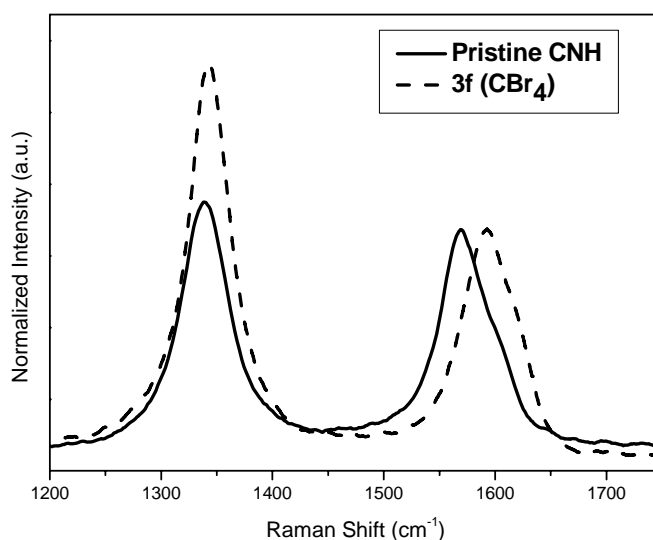

**Figure S1.** Raman spectra of CNHs and functionalized malonate derivative **3f**, obtained under conventional Bingel reaction conditions (laser line for excitation at 514 nm). The spectra are normalized to the peak intensity of the G band.

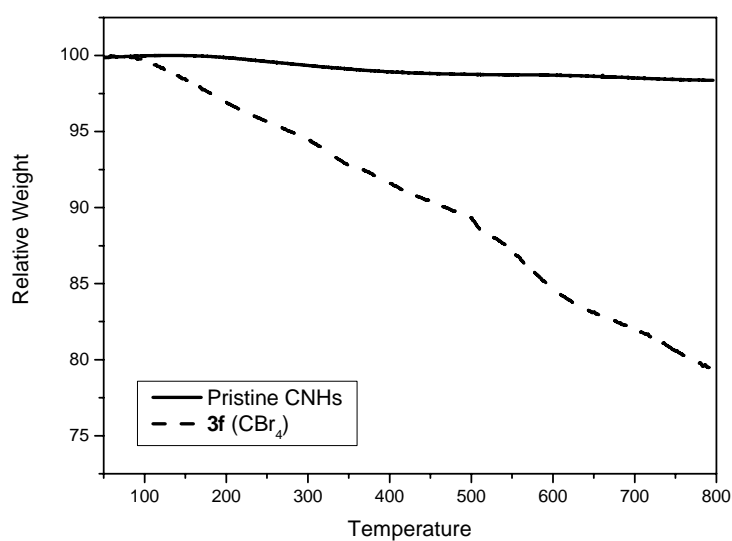

**Figure S2.** TGA graphs of functionalized CNHs **3f**, obtained under conventional Bingel reaction conditions (dashed line) and pristine CNHs (solid line). Heating rate is kept constant at 10 °C/min under N<sub>2</sub> flow.

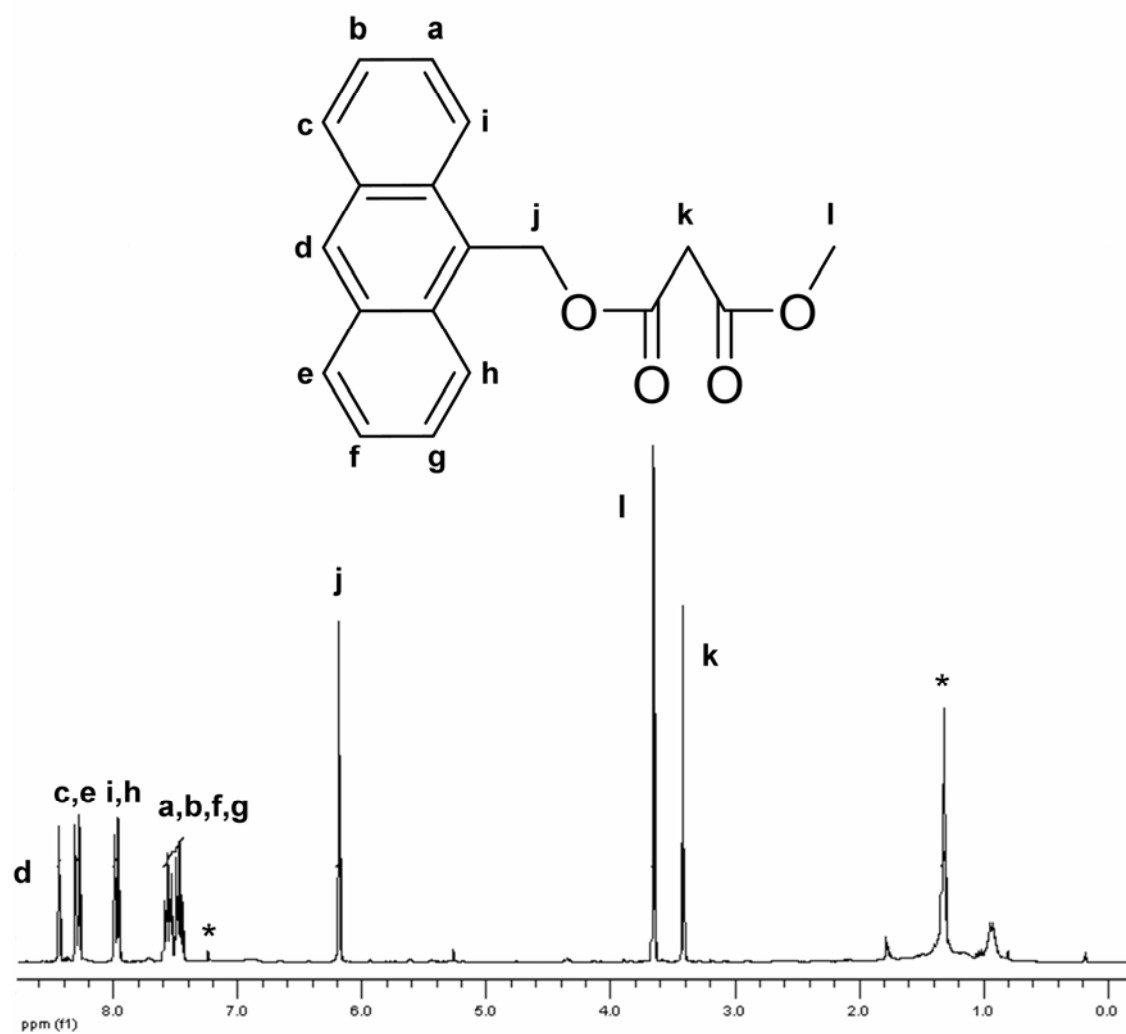

**Figure S3.**  $^1\text{H}$  NMR spectrum of anthracene malonate derivative **1**.

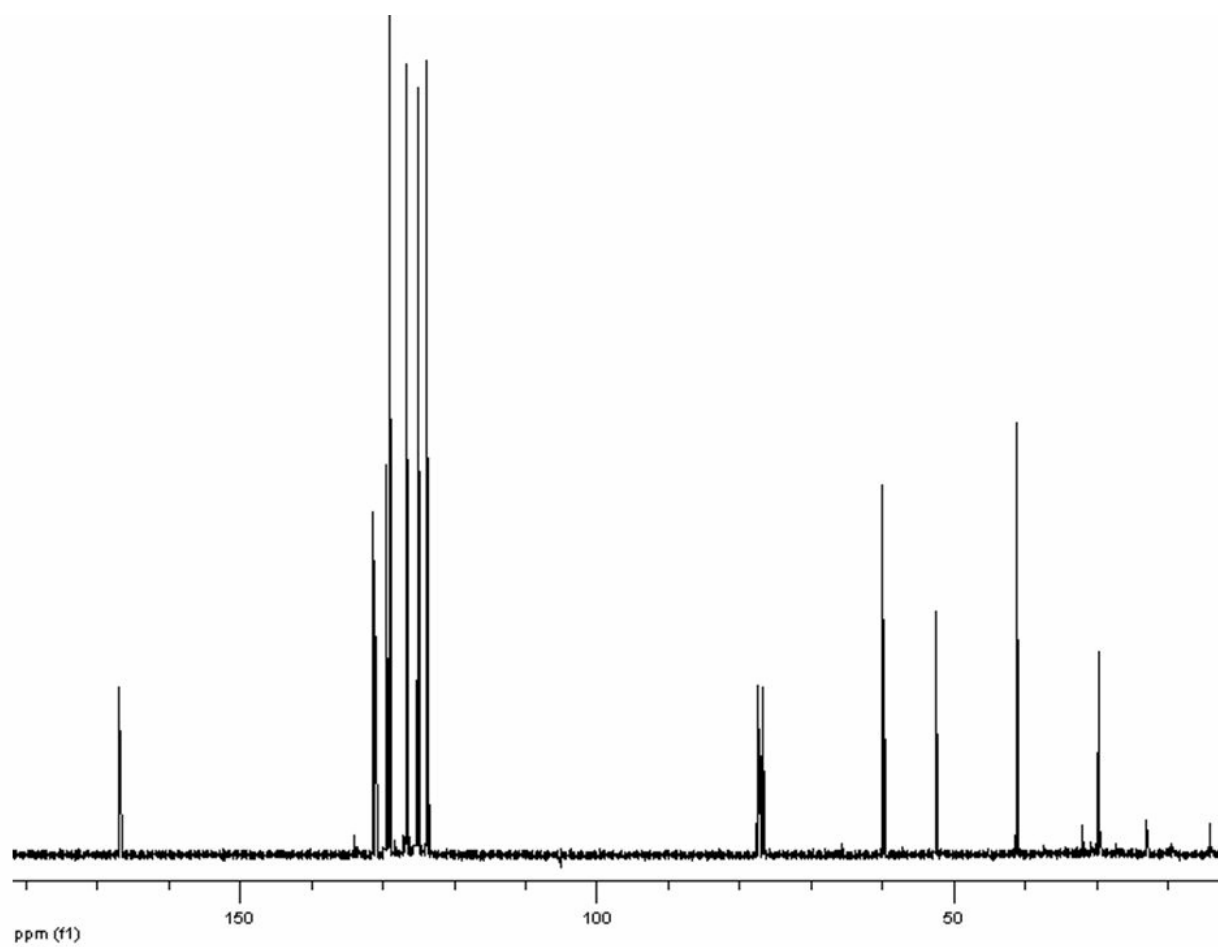

**Figure S4.**  $^{13}\text{C}$  NMR of anthracene malonate derivative **1**.

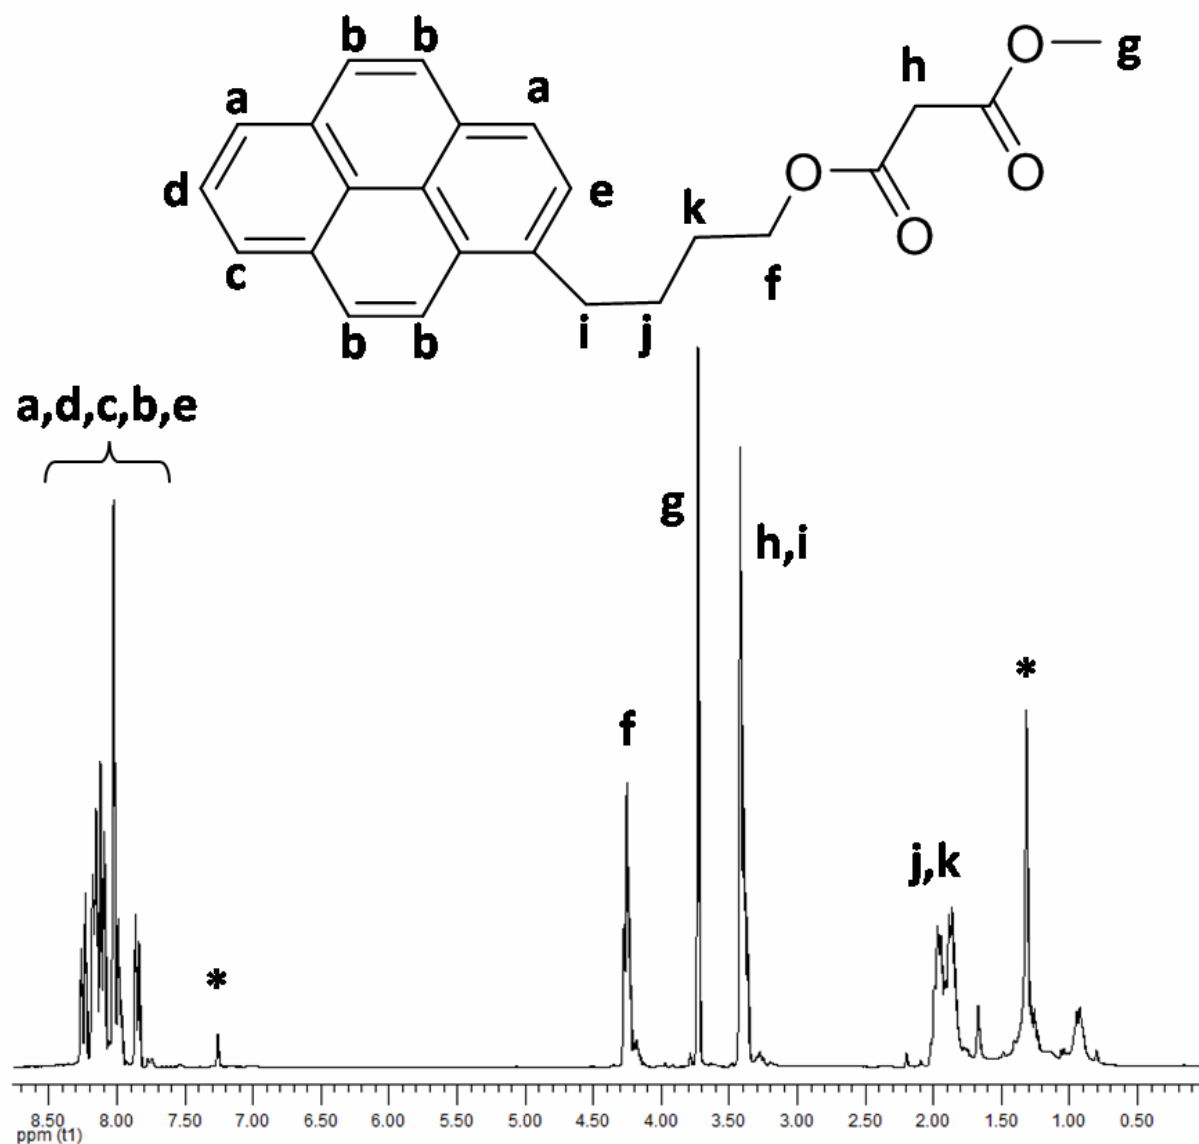

**Figure S5.**  $^1\text{H}$  NMR spectrum of pyrene malonate derivative **2**.

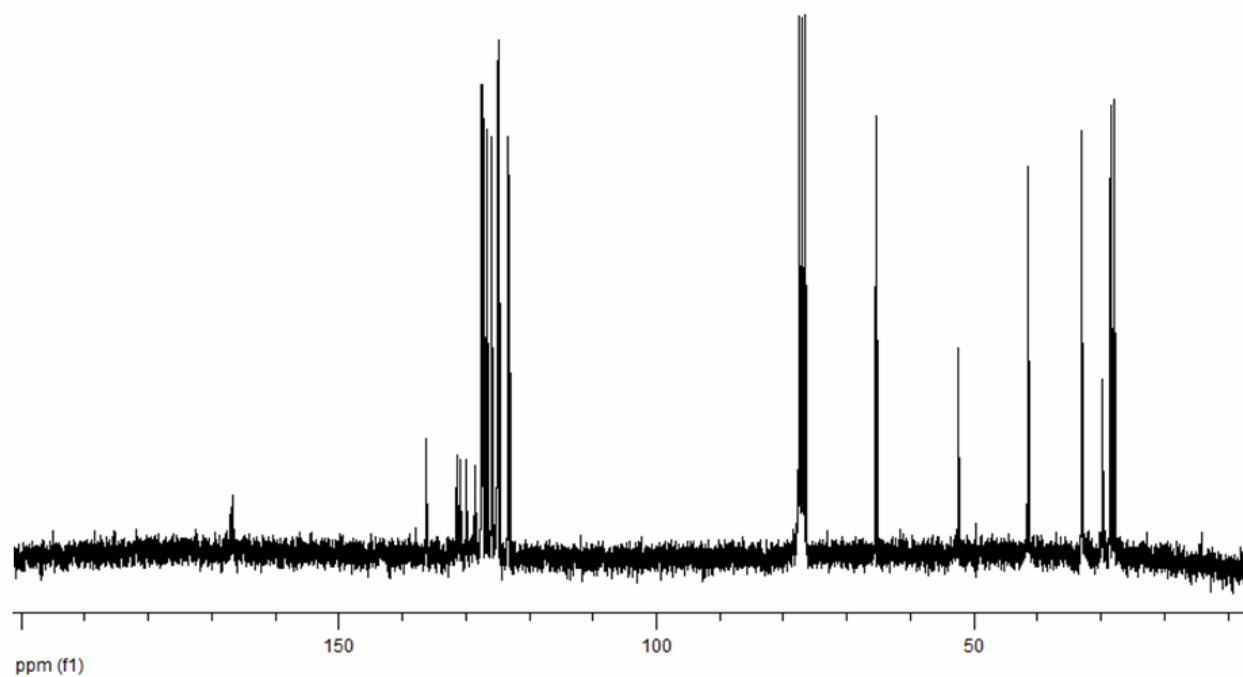

**Figure S6.**  $^{13}\text{C}$  NMR spectrum of pyrene malonate derivative **2**.

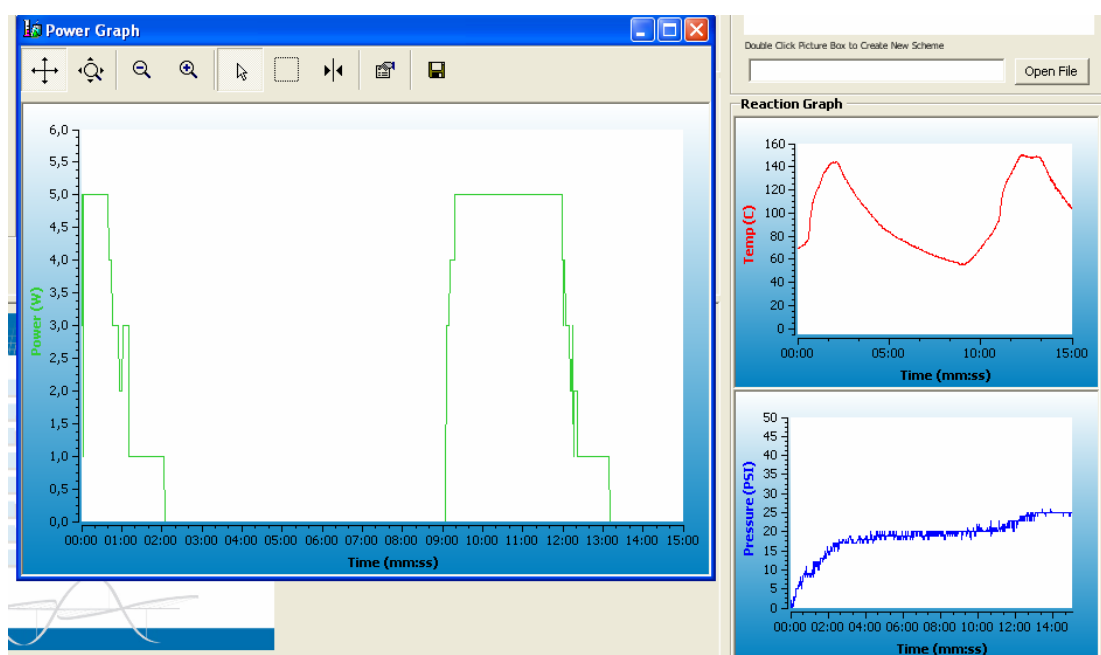

**Figure S7.** Power, temperature and pressure over time graphs, obtained from the Synergy software of the CEM discover microwave reactor, following the reaction conditions of **3b**.

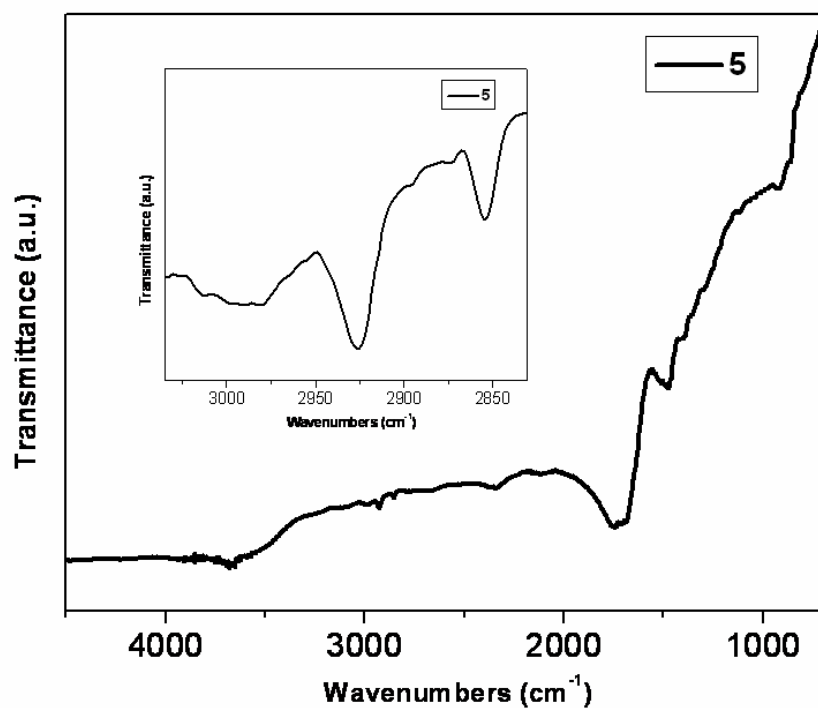

**Figure S8.** ATR-IR spectrum of functionalized CNHs material **5** and magnification of region 2900-3100 cm<sup>-1</sup> (inset).



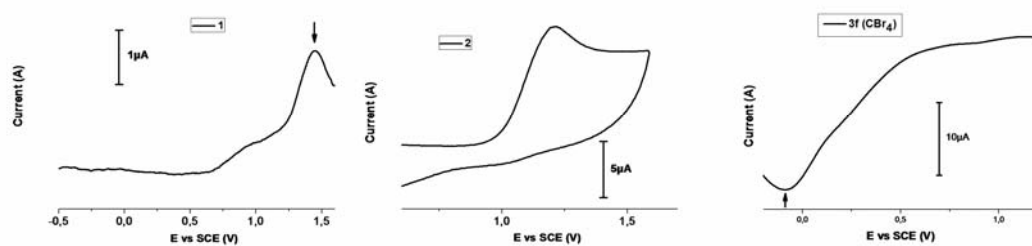

**Figure S9.** Differential pulse voltammetry (oxidation run) of anthracene malonate **1** (left), cyclic voltammetry of pyrene malonate **2** (middle), obtained at a scan rate of 200mV/s and differential pulse voltammetry (reduction run) of material **3** (right).

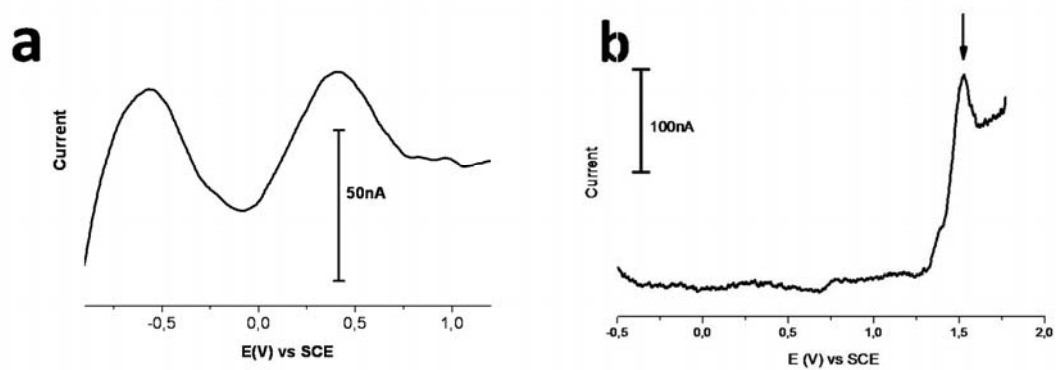

**Figure S10.** Differential pulse voltammetry of material **4**. Reduction (a) and oxidation (b) runs.
